# Supplementary material for: Incidence trend of type 2 diabetes from 2012 to 2021 in Germany: an analysis of health claims data of 11 million statutorily insured people
Source: Springer Nature journal article supplement (doi:10.1007/s00125-024-06113-8), 2024-02-26
Supplement: MOESM1 [file 125_2024_6113_MOESM1_ESM.pdf]

## Incidence Trend of Type 2 Diabetes from 2012 to 2021 in Germany: An analysis of health claims data of 11 million statutorily insured people

### Electronic supplementary material (ESM)

ESM Table 1. Regression models 1 and 2 for modeling type 2 diabetes age-standardised incidence rate by sex

|                                | Age-standardized incidence rate                                                  |                                                                                          |                                                                                  |                                                                                          |
|--------------------------------|----------------------------------------------------------------------------------|------------------------------------------------------------------------------------------|----------------------------------------------------------------------------------|------------------------------------------------------------------------------------------|
|                                | Men                                                                              |                                                                                          | Women                                                                            |                                                                                          |
|                                | Model 1 with pandemic and seasonal effect<br>(coefficient; 95% CI <sup>a</sup> ) | Model 2 with pandemic but without seasonal effect<br>(coefficient; 95% CI <sup>a</sup> ) | Model 1 with pandemic and seasonal effect<br>(coefficient; 95% CI <sup>a</sup> ) | Model 2 with pandemic but without seasonal effect<br>(coefficient; 95% CI <sup>a</sup> ) |
| <b>Time in yearly quarters</b> |                                                                                  |                                                                                          |                                                                                  |                                                                                          |
| <b>Quarter 1</b>               | -209.1* (-240.3, -177.8)                                                         | -193.3* (-247.2, -139.5)                                                                 | -191.3* (-218.3, -164.2)                                                         | -185.6* (-216.9, -154.2)                                                                 |
| <b>Quarter 2</b>               | -232.5* (-299.1, -166.0)                                                         | -                                                                                        | -91.0* (-148.6, -33.3)                                                           | -                                                                                        |
| <b>Quarter 3</b>               | -276.8* (-342.9, -210.6)                                                         | -                                                                                        | -106.0* (-163.1, -48.8)                                                          | -                                                                                        |
| <b>Quarter 3</b>               | -199.1* (-265.1, -133.2)                                                         | -                                                                                        | -94.5* (-151.6, -37.4)                                                           | -                                                                                        |
| <b>Pandemic Period</b>         | 22.1 (-44.7, 88.9)                                                               | 5.6 (-110.5, 121.7)                                                                      | 40.0 (-17.8, 97.7)                                                               | 34.0 (-33.6, 101.6)                                                                      |
| <b>Constant</b>                | 1.882,0* (1.785,2, 1.978,7)                                                      | 1.664,7* (1.520,2, 1,809,3)                                                              | 1.503,2*                                                                         | 1.415,9* (1.331,8, 1,500,0)                                                              |
| <b>Corrected AIC</b>           | -87.4                                                                            | -42.1                                                                                    | -77.4                                                                            | -58.0                                                                                    |
| <b>Adjusted R<sup>2</sup></b>  | 0.874                                                                            | 0.591                                                                                    | 0.859                                                                            | 0.798                                                                                    |
| <b>F Statistic</b>             | 54.5* (df = 5; 34)                                                               | 32.0* (df = 2; 37)                                                                       | 48.2*(df = 5; 34)                                                                | 81.5* (df = 2; 37)                                                                       |

<sup>a</sup> unstandardised regression coefficients 95% confidence interval

\*p<0.05

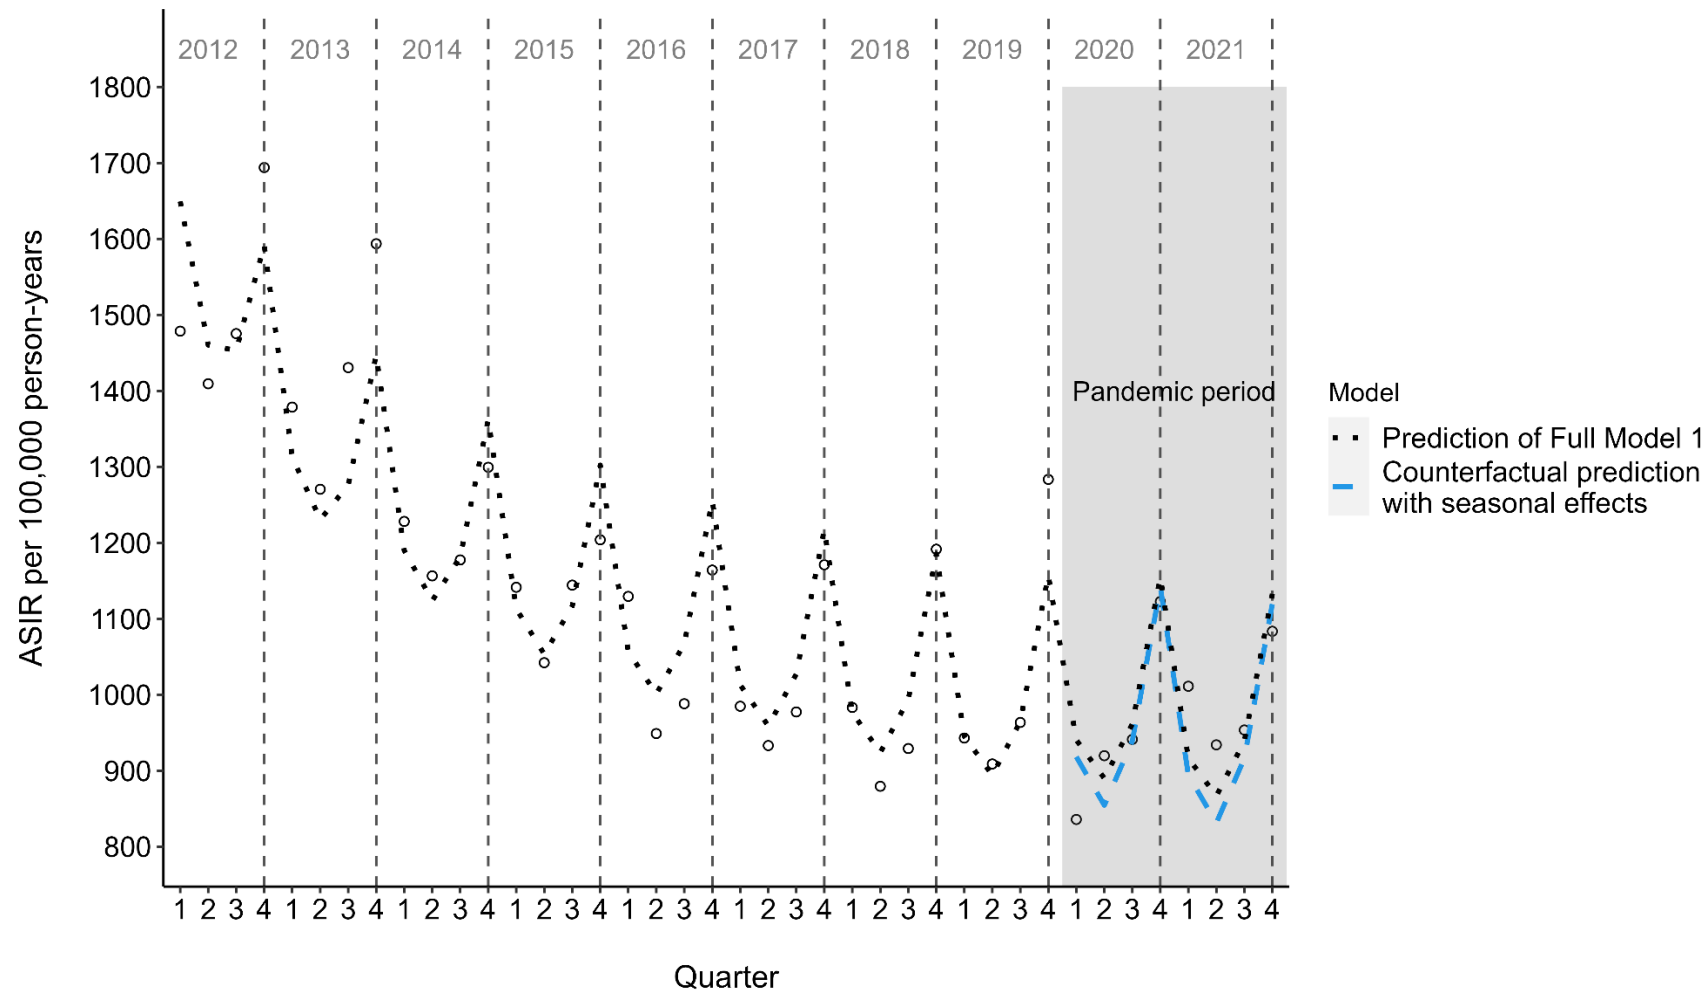

ESM Fig. 1. Prediction of type 2 diabetes ASIR from 2012 to 2021 for men. Black dotted line, full Model 1 adjusted for time trend, pandemic effect and seasonal effects; blue dotted line, predictions based on Model 4 adjusted for time trend and seasonal effects using data from 2012 to 2019 (counterfactual prediction with seasonal effects)

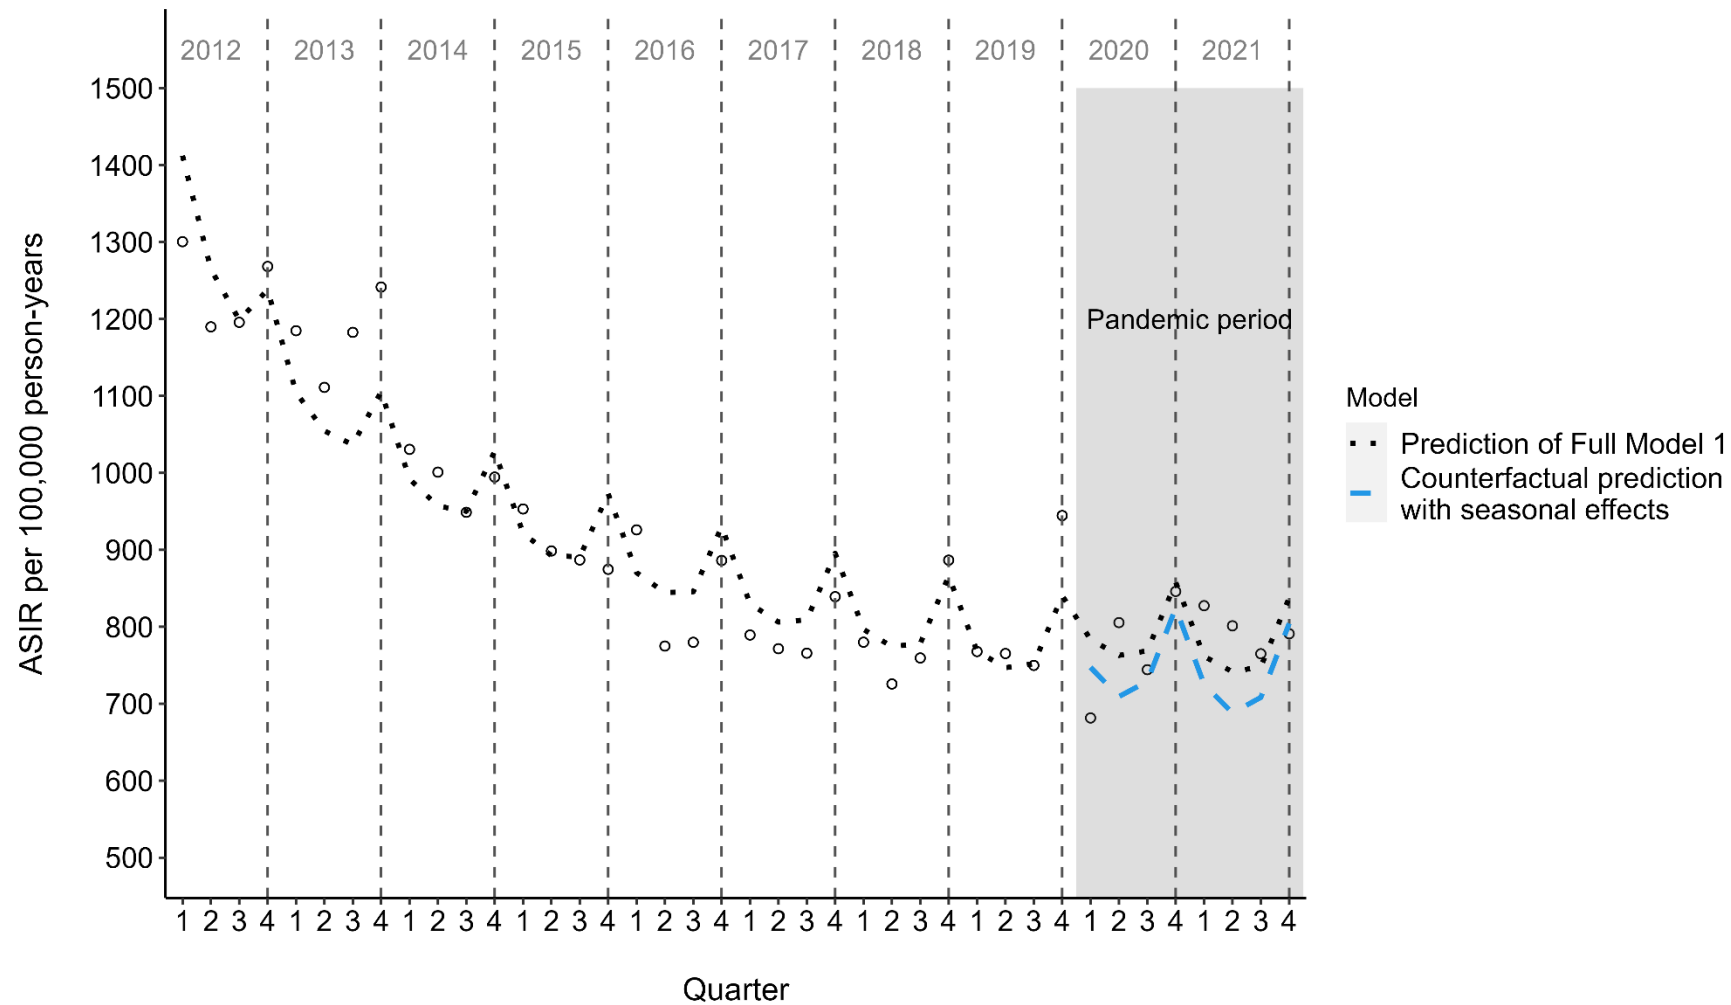

ESM Fig. 2. Prediction of type 2 diabetes ASIR from 2012 to 2021 for women. Black dotted line, full Model 1 adjusted for time trend, pandemic effect and seasonal effects; blue dotted line, predictions based on Model 4 adjusted for time trend and seasonal effects using data from 2012 to 2019 (counterfactual prediction with seasonal effects)
